# Supplementary material for: Feasibility and acceptability pilot study of an online weight loss program in rural, underserved communities
Source: PeerJ. 2024 Oct 3;12:e18268. doi: 10.7717/peerj.18268 (PMC11456290; doi:10.7717/peerj.18268)
Supplement: Supplemental Information 11 — Raw data from 24-hour food collection at baseline, 3 months, 6 months, and 1 year. [file peerj-12-18268-s011.xlsx]

## Sheet: Full Baseline 24 HrRecords
Name:
Food Name	Portion Size	Calorie (kcal)	Protein (g)	Fiber (g)
Breakfast
Large Eggs	2	140	12	0
Thomas Light Multi-grain English Muffin	1	100	5	8
Pineapple Chunks	6 oz.	85	1.2	2.4
Lunch
Med Salad with Chicken (Noodles & Co.)	1 regular	390	30	4
Dinner
Tuna with Mayo	1	115	17	0
Large Egg	1	70	6	0
Triscuit Crackers (Original)	10 crackers	200	5	5
Snack
Iced, Sugar-free Vanilla Almond Latte	16 oz.	65	2	1
Snickers mini	2 pieces	85	1.5	0.5
Total		1250	79.7	20.9
Food Name	Portion Size	Calorie (kcal)	Protein (g)	Fiber (g)
Breakfast
Coconut milk	9 oz	50	0	1
Honey	1 Tbsp	64	0	0
Isagenix Shake	2 scoops	240	24	4
Coffee	3 cups	282	0	0
Lunch
Veggie chips	1 cup	118	1	1
Mayonnaise	1 tsp	31	0	0
Lunch meat	3 thin slices	90	12	0
Snack
Potato chips	1 serving	150	1	0
Dinner
Baked chicken	2 pieces	240	52	0
Potato salad	1/2 cup	600	6	6
Snack
Nack flavored chips	1 serving	140	2	1
Total		2005	98	13
Food Name	Portion Size	Calorie (kcal)	Protein (g)	Fiber (g)
Breakfast
Real Ketones Orange Blast	1 packet	15	0	0
Snack
Whey protein	1 scoop	120	24	0
Coffee	24 oz	15	0	0
Coffee mate	3 tbsp	90	0	0
Lunch
Colby Jack Cheese	1.5 oz	170	10	0
Blue diamond smokehouse almonds	2 oz	344	12	6
Dill pickle slices	16 slices	80	0	0
Dinner
Chicken breast	4 oz	130	28	0
Carrots	1 cup	50	1	3
Tri-color slaw	2 cups	67	5	5
Broccoli	2 cups	67	8	12
Olive oil	1 Tbsp	119	0	0
Chicken broth	1/4 cup	13	1	0
Yellow onions	1/4 cup	18	1	1
Snack
Coffee mate	3 tbsp	90	0	0
Coffee	24 oz	15	0	0
Whey protein	1 scoop	120	24	0
Total		1523	114	27
Food Name	Portion Size	Calorie (kcal)	Protein (g)	Fiber (g)
Breakfast
Kellogg's Raisin Bran	1 cup	190	5	7
2% milk	3/4 cup	98	6	0
Snack
Lipton decaf tea	2 cups	0	0	0
Oatmeal raisin cookies	3 cookies	282	5	2
Lunch
Motts applesauce	1 cup	45	0	1
Lay's potato chips	1 cup	160	2	1
Sour cream and onion dip	1 Tbsp	25	1	0
Cheddar cheese	2 slices	180	18	0
Deli turkey	4 slices	120	24	0
Whole grain bread	2 slices	161	8	4
Dinner
Italian bread bun	1 bun	110	4	1
Mozzarella cheese	1/4 cup	40	4	0
Iceberg lettuce	2 cups	16	1	1
Croutons	1 Tbsp	35	1	0
Cheddar cheese	1/4 cup	41	3	0
Ranch dressing	2 Tbsp	140	1	0
Prego sauce w/meat	1/4 cup	138	4	6
Spaghetti noodles	2 cups	280	9	3
Butter	1 tsp	32	0	0
Snack
Popcorn	2 cups	35	1	0
Total		2128	97	26
Food Name	Portion Size	Calorie (kcal)	Protein (g)	Fiber (g)
Breakfast
Oatmeal	3/4 cup	232.8	8	6.2
Brown sugar	1 Tbsp	48.8	0	0
Hard-cooked eggs	2 eggs	125.8	11.1	0
Banana	1 medium	105	1.3	3.1
Lunch
Turkey sandwich - Jimmy John's	3" of sub	239.2	21.5	1.1
Cheetos	Single serve bag	156.8	1.6	0.4
Snack
White cheddar Smartfood popcorn	3 cups	207.1	3.3	3.9
Dinner
Hot dog	1 hot dog	166.4	5.8	0
Ketchup	1 Tbsp	17.2	0.2	0.1
Hot dog bun	1 bun	118.3	4.3	1.7
Baked beans	1/2 cup	132.8	5.7	5.6
Total		1550.2	62.8	22.1
Food Name	Portion Size	Calorie (kcal)	Protein (g)	Fiber (g)
Breakfast
Cream, half n half	2 Tbsp	36.9	0.9	0
Coffee	2 cups	4.8	0.6	0
Oatmeal	1/3 cup	102.4	3.5	2.7
Almond milk, unsweetened	2/3 cup	62.1	0.7	0.7
Banana	1 medium	105	1.3	3.1
Orange juice, with pulp	3 oz	41.9	0.7	0.2
Snack
Cream, half n half	2 Tbsp	36.9	0.9	0
Coffee	2 cups	4.8	0.6	0
Snack
Nut thin gluten free crackers	4 crackers	31	0.7	0
Cheddar cheese	2 slices	169.7	15.5	0.5
Lunch
Chicken salad w/3 Tbsp vinagrette	4 oz	167.2	15.5	0.5
Pecans	1/4 cup	201	2.7	2.7
Snack
Cream, half n half	2 Tbsp	36.9	0.9	0
Coffee	2 cups	4.8	0.6	0
Snack
Nut thin gluten free crackers	4 crackers	31	0.7	0
Cheddar cheese	2 slices	169.7	15.5	0.5
Dinner
Grapes	20 grapes	69	0.7	0.9
Beef stew	3 cups	597.2	47	10.6
Snack
Nut thin gluten free crackers	4 crackers	31	0.7	0
Total		1903.3	109.7	22.4
Food Name	Portion Size	Calorie (kcal)	Protein (g)	Fiber (g)
Breakfast
Fried egg in butter	2 eggs	163.2	10.6	0
Split top whole wheat	2 slices	181.4	9	4.3
Snack
Apple	1 medium	94.6	0.5	4.4
Lunch
Taco salad w/ ground turkey	3.5 oz	292	31	7
Dinner
Meat loaf with beef, pork, venison	4.0 oz	176.8	15.5	0.5
Mashed potatoes	3.2 oz	210.3	4.4	0.7
Snack
Creter Cheese Caramel Popcorn	1 cup	132.7	1.4	4.5
Total		1251	72.4	21.4
Food Name	Portion Size	Calorie (kcal)	Protein (g)	Fiber (g)
Lunch
Romaine lettuce	3 cups	19.9	1.5	3.3
French Dressing	3 Tbsp	177.4	0.5	0.4
Cherry tomatoes	5 tomatoes	7.1	0.3	0.5
Dinner
Sam's Club Frozen Noodle Bowl	1 bowl	500	12	4
Total		704.4	14.3	8.2
Food Name	Portion Size	Calorie (kcal)	Protein (g)	Fiber (g)
Breakfast
Oats and Honey Cereal	1 cup	160.4	2.8	1.7
Skim Milk	1/2 cup	42.7	4.1	0
Dinner
Eggplant Parmesan	4 slices	278.1	11.6	3.3
Snack
Lowfat Vanilla Yogurt	1/2 cup	89.4	6.2	0
Total		570.6	24.7	5
Food Name	Portion Size	Calorie (kcal)	Protein (g)	Fiber (g)
Breakfast
Coffee	3 cups	7.2	0.9	0
Creamer w/sugar	2 T	81.6	0.6	0
Pea Protein	1 scoop	178.2	21	0
Flax seeds	1 T	143.5	4.9	7.3
Chia seeds	1 T	143.5	4.9	7.3
Almond milk unsweetened	2 cups	73.2	2.9	0
Banana	1 medium	105	1.3	3.1
Blackberries	1 cup	61.9	2	7.6
Snack
Ding dong	1 pastry	303.4	2.7	1
Lunch
Mayonnaise	1 Tbsp	93.8	0.1	0
Cherry tomatoes	6 tomatoes	18.4	0.9	1.2
Tuna	1/2 can	77.3	17.3	0
Radish	5 small	1.6	0.1	0.2
Croissant	1 roll	231.4	4.7	1.5
Dinner
Chicken cacciatore	1 cup	321.4	23.4	3.1
White rice	1 cup	210.3	4.4	0.7
S'more	1 s'more	390.6	5.3	2.4
Total		2442.3	97.4	35.4
Food Name	Portion Size	Calorie (kcal)	Protein (g)	Fiber (g)
Breakfast
Dunkin' Donuts Coconut Iced Coffee Bottle	1 bottle	250	7	0
Lunch
Campbell's Soup on the Go - Creamy Tomato	1 container	220	4	2
Dinner
Lean Ground Beef	4 oz	280.1	19.8	0
Butter	1 Tbsp	101.8	0.1	0
Corn	1/4 cup	40.6	1	1
Potato	1 Small	213.9	4.5	3.5
Sweet Iced Tea	16.9 fl oz	157.2	0.1	0.5
Total		1263.6	36.5	7
Food Name	Portion Size	Calorie (kcal)	Protein (g)	Fiber (g)
Breakfast
Coffee	1 cup	2	0	0
Vanilla creamer	3 servings	45	0	0
Honey bunches of oats	2 servings	85	2	1
2% milk	1.5 cups	210	15	0
Lunch
Grape water flavor drops	1 squirt	3.8	0	0
Ham and cheese hot pockets	1 pocket	240	8	1
Snack
Cake with icing	1 slice	262	2	0
Snack
Honey bunches of oats	1 serving	43	1	1
Cinnamon toast crunch	1 serving	66	1	1
2% milk	2 cups	280	20	0
Dinner
Grape water flavor drops	1 squirt	3.8	0	0
Breaded cheese sticks	7 sticks	700	25	4
Snack
Cheez-its		450	3	5
Total		2390.6	77	13
Food Name	Portion Size	Calorie (kcal)	Protein (g)	Fiber (g)
Breakfast
Salted Caramel Almond Creamer	3 Tbsp	75	3	0
Caramel	1 tsp	22	0	0
Coffee	1 cup	2	0	0
Lunch
BBQ Pork	1 cup	440	60	0
Au gratin potatoes	1/2 cup	190	7	1
Green beans	1/2 cup	16	1	1
Coke	20 oz	240	0	0
Snack
Oreos	2 cookies	107	1	1
Dinner
Cheese quesadilla	1/2 of 8"	137	9	2
Cheese enchilada	1 slice	240	9	0
Chips	15 chips	240	3	5
Salsa	1/2 cup	40	1	2
Blue Margarita	8 oz	150	0	0
Total		1899	94	12
Food Name	Portion Size	Calorie (kcal)	Protein (g)	Fiber (g)
Breakfast
Black coffee	8 oz	5	0	0
Yogurt	3/4 cup	60	4	0
Blueberries	1/4 cup	21	0	1
Raspberries	1/4 cup	16	0	2
Snack
Coffee	8 oz	5	0	0
Snack
Almonds	30 almonds	208	8	5
Lunch
Chicken McNuggets	10 pieces	550	25	3
Fries	1 medium	297	5	0
Coke	20 oz	240	0	0
Dinner
Rootbeer	20 oz	220	0	0
Guacamole	3 Tbsp	75	1	2
Refried beans	2 Tbsp	25	1	0
Cheese	3/4 cup	248	16	0
Hard taco shells	3 shells	195	3	3
Lettuce	1 cup	5	0	0
Ham	1/3 cup	317	34	0
Total		2487	97	16
Food Name	Portion Size	Calorie (kcal)	Protein (g)	Fiber (g)
Snack
Caramel Macchiato Can	1 can	39	2	0
Breakfast
Plain bagel	1 bagel	110	4	4
Whipped Cream Cheese	1.5 Tbsp	53	1	0
Lunch
Club sandwich	1 sandwich on roll	610	47	5
Ruffles chips	15-20 chips	280	3	2
Snack
Dannon's Light n Fit	1 container	110	7	0
Snack
Pepsi	1 can	150	0	0
Onion gravy	2 Tbsp	9	0	0
Mashed potatoes	1.5 cups	330	33	9
Chop Steak	1 medium chop	420	0	9
Total		2111	97	29
Food Name	Portion Size	Calorie (kcal)	Protein (g)	Fiber (g)
Snack
Granola	1 bar	118	2.5	1.3
Breakfast
Egg	1 serving	142	12.5	0
Sharp cheddar cheese slice	1 slice	80	5	0
Whole wheat bread	1/2 slice	32.5	1.5	0.8
V8 Fruit Juice	1 can	50	0	0
Turkey slices	2 thick slices	108	16	0
Snack
Light Greek Yogurt	1 cup	136	8	0
Trail mix w/ fruit and nuts	1/4 cup	158.2	3.8	2.2
Dinner
Grilled porkchop	1-6oz chop	140	21	1
Baked potato	1 medium	164	4	4.5
Shredded cheese	1/4 cup shredded	80	8	0
Snack
Sugar-free peppermint patties	3 pieces	120	1	3
Total		1328.7	83.3	12.8
Food Name	Portion Size	Calorie (kcal)	Protein (g)	Fiber (g)
Breakfast
Yogurt	2/3 cup	125	4	0
Granola	1/2 cup	280	0	4.3
Coffee	12 oz	8	0	0
Lunch
Peanut butter jelly sandwich	1/2 sandwich	310	11	4
Apple	1	95	1	4
Dinner
Mustard	1	3	0.2	0.2
Butter	1	102	0	0
Baked Beans	1	280	12	10
Tea	1	0	0	0
Snacks
Hotdog bun	1	125.5	4.4	0.8
Hotdog bun	1	230	5	0
M&Ms	8 pieces	140	0	0
Kit Kat	1 bar	210	3	0
Jelly Beans	4	21	0	0
Jelly Beans	4	21	0	0
Cheesecake	1.5 slices frozen	410.9	7	0.5
Buttered Popcorn	1 handful	75.3	1.2	1.4
Total		2436.7	48.8	25.2

## Sheet: Full 3 Month Records
24 hr Record Name:
Food Name	Portion Size	Calorie (kcal)	Protein (g)	Fiber (g)
Breakfast Time:
Large Eggs	2	140	12	0
Thomas Light Multi-grain English Muffin	1	100	5	8
Pineapple Chunks	6 oz.	85	1.2	2.4
Lunch Time:
Med Salad with Chicken (Noodles & Co.)	1 regular	390	30	4
Dinner Time:
Tuna with Mayo	1	115	17	0
Large Egg	1	70	6	0
Triscuit Crackers (Original)	10 crackers	200	5	5
Snack: Time
Iced, Sugar-free Vanilla Almond Latte	16 oz.	65	2	1
Snickers mini	2 pieces	85	1.5	0.5
Total		1250	79.7	20.9
24 hr Record Name: Jonna
Food Name	Portion Size	Calorie (kcal)	Protein (g)	Fiber (g)
Breakfast 7:00 AM
Yogurt, Greek, low fat milk, flavors other than fruit	1	142.5	12.96	0
Blueberries, raw	1	38.76	0.5032	1.632
Strawberries, raw	4	15.36	0.3216	0.96
Egg omelet or scrambled egg, made with cooking spray	1	86.01	7.1248	0
Milk, calcium fortified, whole	2	37.21	1.9215	0
Coffee, brewed	1	4.8	0.576	0
Lunch 11:00 AM
Cereal or granola bar, peanuts , oats, sugar, wheat germ	1	202.53	4.343	2.279
Applesauce canned sweetened w/o salt	1	167	0.394	2.95
Water, tap	1	0
Cookie, oatmeal	1	90	1.24	0.56
Pudding, chocolate, prepared from dry mix, milk added	1	274.05	8.1693	1.827
Parmesan cheese, topping, fat free	1	18.5	2	0
Dinner 6:00 PM
Spaghetti sauce with meat and added vegetables	1	218.4	15.392	3.64
Pasta, cooked	1	219.8	8.064	2.52
Beans, string, cooked, from fresh, NS as to color, made with oil	1	83.2	2.353	4.03
Total		1598.12	65.3624	20.398
24 hr Record Name: John
Food Name	Portion Size	Calorie (kcal)	Protein (g)	Fiber (g)
Breakfast 7:00 AM
Coffee		4.8	0.6	0
w cream		80	2	0
Oatmeal	1/3 c	160	6	4
Almond milk	2/3 cup	23.2	0.3	0.2
Banana		105	1.3	3.1
Lime yogurt	150g	140	11	1
2 fried eggs		272	18.4	0
w cheddar cheese		41	3	0
w sausage	½ c	188	11.25	0
Orange slices	1/2	31	1.5	0.6
w coconut	1 tbsp	3	1	2
OJ	3 oz	41	0.8	0
Coffee		4.8	0.6	0
w cream		80	2	0
Lunch 11:00 AM
Bob Evans mashed potatoes	2 serv	300	6	8
Schwann’s meatballs	3 (½ serv)	105	14	1
1 fried egg		136	9.2	0
w cheddar cheese		20.5	1.5	0
w sausage		94	5.6	0
Vanilla yogurt	¾ c	130	14	1
7 Up	8 oz	90	0	0
Homemade cookie made with	1	178	4.9	2.7
-Oatmeal, peanut butter, choc chip, maple syrup
Dinner 6:00 PM
Taco
Soft shell	1	60	4	0.5
Beef	¼ c	85	7.5	0
Brown rice	¼ c cooked	85	1.5	1
Cheddar cheese	¼ c	120	6	0
Peppers & onions (olive oil)	1 c	75	0	2
Cheddar (add’l)	1 slice	80	5	0
Wine	2 oz	50	0.4	0
Orange slices	1/2	31	1.5	0.6
w coconut	1 tbsp	3	1	2
Total		2816.3	141.85	29.7
24 hr Record Name: Jennifer
Food Name	Portion Size	Calorie (kcal)	Protein (g)	Fiber (g)
Breakfast 7:15 AM
activia probiotic yogurt drink	1	70	3	1
Coffee, brewed	1	4.8	0.576	0
Coffee creamer,powder, sugar free, flavored	5	79.35	0.372	0
egg	3	70	6	0
Bacon or side pork, fresh, cooked	1	37.44	2.7136	0
american cheese	1	60	3	0
Lunch 11:00 AM
subway chicken bacon ranch	1	610	34	3
Snack 2:00 PM
clear america can	1	1	0	0
Dinner 6:25PM
Bacon or side pork, fresh, cooked	2.5	93.6	6.784	0
Total		1026.19	56.4456	4
24 hr Record Name: Julie N
Food Name	Portion Size	Calorie (kcal)	Protein (g)	Fiber (g)
Snack 3:15 AM
Quest protein bar, choc chip cookie dough	0.5	100	10.5	7
Breakfast 6:30 AM
cheddar cheese	1	80	5	0
hard boiled egg	1	70	6	0
multi grain wrap	1	60	5	8
turkey sandwich meat	0.5	100	18	0
Lunch 3:30 PM
Oikos Greek yogurt	1	100	15	3
mixed fruit cup	1	70	0	1
V8 Energy juice	1	50	0	0
Snack 5:30 pm
no sugar added extra dark chocolate	1	140	3	8
Dinner 6:00 PM
Beef vegetable soup with potato, pasta, or rice, chunky style, canned, or ready-to-serve	2	230.4	15.264	5.76
bread	1	110	5	3
cheddar cheese	1	80	5	0
Total		1190.4	87.764	35.76
24 hr Record Name: Julie S
Food Name	Portion Size	Calorie (kcal)	Protein (g)	Fiber (g)
Breakfast Time?
Bread	1	70	3	1
Fried Egg	1	92	6	0
Lunch Time?
Overnight oats	1	346	30.7	8.6
Dinner Time?
Venison steak	4 oz	170	34	0
Mashed potatoes	1/2 cup	150	3	1
Corn on the cob	1 cop	126	4.8	2.9
Snacks Times?
Apple	1 medium	104	0.05	4
Premium protein shake	1 shake	160	30	0
Total		1218	111.55	17.5
24 hr Record Name: Karen
Food Name	Portion Size	Calorie (kcal)	Protein (g)	Fiber (g)
Breakfast 8:30 am
Cereal (General Mills Cheerios)	1	105.28	3.3852	2.632
Milk, reduced fat (2%)	1	122	8.052	0
Orange juice, 100%, NFS	4	59.52	0.8432	0.372
Lunch 12:30 pm
Lean Cuisine 5 cheese rigatoni	1	360	14	4
Romaine lettuce, raw	1	6.65	0.4865	1.085
Ranch dip, regular	1	64.95	0.336	0.045
Croutons	1	55.8	1.296	0.6
Cheese, Cheddar	0.5	228.26	12.9215	0
Snack 6:30 pm
Protein Shake	1	160	15	5
Dinner 7:30 pm
Cookie, graham cracker with chocolate and marshmallow	1	102.3	1.3992	0.616
Milk, reduced fat (2%)	1	122	8.052	0
Total		1386.76	65.7716	14.35
24 hr Record Name: Elisha
Food Name	Portion Size	Calorie (kcal)	Protein (g)	Fiber (g)
Breakfast
Oatmeal	1 Packet	128.8	3.3	2.7
Sunflower Seeds	2 Tbsp	104.8	3.5	2
Coffee	2 Cups	4.8	0.6	0
Lunch
Flour tortilla	2 taco size	202	5.4	2.3
Guacamole	1/4 Cup	93	1.2	3.9
White rice	1/2 Cup	105.1	2.2	0.3
Refried beans	2 Tbsp	45.5	1.9	1.7
Ground beef	1/2 Cup	162.5	16	0
Dinner
Ritz crackers	4	61.2	0.8	0.3
Bologna	1 slice	78.7	2.9	0
Colby Jack Cheese	2 slices	161.3	10.1	0
Snack
Orville popcorn, light butter	single serve bag	100	3	4
Cheese Cake Blizzard	1 small	750	14	0
Total		1997.7	64.9	17.2
24 hr Record Name: Ashley
Food Name	Portion Size	Calorie (kcal)	Protein (g)	Fiber (g)
Breakfast 7:00 AM
Egg, whole, baked, fat not added in cooking	1	53.6	4.592	0
Bacon, NS as to type of meat, cooked	2	46.8	3.392	0
Lunch 11:30 AM
Chicken salad spread	1	416	24.2112	0
Vegetable soup, reduced sodium, canned, ready to serve	1	217	5.0344	4.774
Bread, whole wheat	2	181.44	8.964	4.32
Snack 3:34 PM
Yogurt, whole milk, flavors other than fruit	1	130.9	5.61	0
Yogurt, whole milk, flavors other than fruit	1	130.9	5.61	0
Dinner 6:45 PM
Lasagna with meat, home recipe	1	403.76	29.252	2.06
Garlic bread, with melted cheese, from frozen	1	301.84	9.1256	1.936
Total		1882.24	95.7912	13.09
24 hr Record Name: Tresa
Food Name	Portion Size	Calorie (kcal)	Protein (g)	Fiber (g)
Breakfast
Coffee	64 fl oz	19	2.1	0
Lunch
Lewis Keto Hawaiian Bread	2 slices	70	12	8
Eckrich Bologna	2 slices	160	6	0
Great value pepper jack cheese	1 slice	70	4	0
Prairie farms small curd cottage cheese	1/2 cup	100	11	0
Dinner
Marketside iceberg lettuce, shredded	3 cups	20	2	2
Taco meat	2 servings	66	6	0
Great value colby and monterey jack cheese shredded	1/3 cup	111	6	0
Tomato	1/2 cup	16	0	1
Snacks
Proven Keto Lean Life Powder Stick	1 stick	70	0	0
Great value lowfat yogurt, strawberry	1 container	120	5	0
Nature valley oats and honey protein crunchy granola	2 tbsp	50	2.5	1
Total		872	56.6	12
24 hr Record Name: Tresa
Food Name	Portion Size	Calorie (kcal)	Protein (g)	Fiber (g)
Breakfast
Coffee	32 fl oz	9	1	0
Lunch
Marketside iceberg lettuce, shredded	2 cups	13	1	1
Farmland diced ham	3 oz	105	11	0
Great value shredded cheddar cheese	1/4 cup	83	6	0
S&W julienne carrots	1/8 cup	9	0	1
Great value real bacon pieces	1/8 cup	60	6	0
Boiled egg	1 large	78	0	6
Ranch dressing	4 tbsp	150	0	0
Broccoli cheese soup, homemade	1 cup	256	9	2
Green beans	1/2 cup	14	2	3
Dinner
Great value fully cooked thick cut bacon	3 slices	90	6	0
Tennessee pride sausage patties	3 patties	300	15	0
Pancake	1 - 4" diameter	99	3	0
Great value syrup, butter flavor	1/2 cup	150	0	0
Total		1416	60	13
24 hr Record Name: Sarah
Food Name	Portion Size	Calorie (kcal)	Protein (g)	Fiber (g)
Breakfast
Quick oats	1/2 cup	153.5	5.5	4.1
Brown sugar	1 Tbsp	52.4	0	0
Banana	1/2 Medium	72.1	0.9	2.1
Eggs fried (no oil)	2 eggs	179	12.3	0
Snack
Smart pop sea salt	1 serving	92.4	3.1	3.5
Lunch
Chicken caesar wrap by marketside	1/2 wrap	270.8	16.8	1.1
Caesar dressing	1 Tbsp	238.5	1	0.2
Veggie straws	2 handfuls	134	1.5	1.3
Diet coke	1 can	0	0	0
Dinner
Spaghetti	1 cup	231	9	1.2
Meat sauce	1/3 cup	231	15.4	3.9
Green beans	1 cup	63	1.6	2.8
Garlic bread	1/2 piece	129.5	3.1	0.9
Total		1847.2	70.2	21.1

## Sheet: Full 6 Month Records
24 hr Record Name:
Food Name	Portion Size	Calorie (kcal)	Protein (g)	Fiber (g)
Breakfast Time and Place:
Large Eggs	2	140	12	0
Thomas Light Multi-grain English Muffin	1	100	5	8
Pineapple Chunks	6 oz.	85	1.2	2.4
Lunch Time and Place:
Med Salad with Chicken (Noodles & Co.)	1 regular	390	30	4
Dinner Time and Place:
Tuna with Mayo	1	115	17	0
Large Egg	1	70	6	0
Triscuit Crackers (Original)	10 crackers	200	5	5
Snack: Time and Place:
Iced, Sugar-free Vanilla Almond Latte	16 oz.	65	2	1
Snickers mini	2 pieces	85	1.5	0.5
Total		1250	79.7	20.9
Food Name	Portion Size	Calorie (kcal)	Protein (g)	Fiber (g)
Breakfast Time and Place: 8am, work, desk
Overnight Oats
Protein Powder	2 Scoops	150.2	26	0
Oatmeal	1.5 Cups Cooked	230.4	8	6.1
Chia Seeds	1 Tbsp	60.1	2.1	3.1
Snack Time and Place: 10 am, work, desk
Hot, Unsweetened Tea	1 Cup	3.6	0	0
Oikos Greek Yogurt	1 Container	100	15	3
Lunch Time and Place: 11:30 am, work, desk
Vegetable Soup	1 1/2 Cups	296.4	8.5	3
Iced, Unsweetened Tea	24 Ounces	7.2	0.1	0
Dinner Time and Place: 6:00 pm, home, table
Butternut Squash, Baked	1 Cup	63	1.4	2.8
Potato, Baked	1 Small	132.5	2.8	2.1
Pork Chop	1 Large	275.4	36.1	0
Greens Salad	1 Cup	6	0.5	0.7
Dressing	1 Tbsp	65	0.3	0
Total		1389.8	100.8	20.8
Food Name	Portion Size	Calorie (kcal)	Protein (g)	Fiber (g)
Breakfast Time and Place: 7 am, home, standing
Oikos Triple Zero Vanilla Greek yogurt	1 container	120	15	6
Coffee	1 cup	2	0.3	0
Lunch Time and Place: 11 am, car, driving
Tuna Spinach Wrap	1 wrap	317	21.9	2.2
Apple	1 whole	95	0.5	4.4
Dinner Time and Place: 6 pm, home, table
Cheesy hash brown casserole	3/4 cup	330	10.8	0
Baked egg with cooking spray	2 eggs	69	5	0
Cucumber	5 slices	4	0.2	0.2
Apple crisp	3/4 cup	341	3.7	3
Snack: Time and Place: 8 pm, home, table
Blueberry açaí tea	1 cup	10	0	0
Total		1288	57.4	15.8
Food Name	Portion Size	Calorie (kcal)	Protein (g)	Fiber (g)
Snack: 3:15 AM Home, Other
Quest protein bar, choc chip cookie dough	1 container	200	21	14
Breakfast: 6:30 AM Home, Table
hard boiled egg	1 egg	70	6	0
multi grain wrap	1 wrap	60	5	8
turkey sandwich meat	4 slices	100	18	0
cheddar cheese	1 slice	80	5	0
Snack 3:00 PM, Home, Table
Almonds, saltedq	1/4 cup	172.084	5.76356	3.0051
Dinner: 5:00 PM, Home, Table
baked potato	1 cup	161	4.3	3.8
Steak, NS as to type of meat, cooked, lean only eaten	1 cup	312.984	49.7202	0
Cheese, Parmesan, dry grated	1 cup	52.08	3.52408	0
Green beans, canned	1 cup	20	1	2
Total		1228.15	119.308	30.8051
Food Name	Portion Size	Calorie (kcal)	Protein (g)	Fiber (g)
Breakfast 7:00 AM
Coffee	24 oz	4.8	0.6	0
w cream	5 Tbsp	100	2	0
Oatmeal	1/3 c	160	6	4
Almond milk	1 cup	30	1	0
Banana	1 Medium	105	1.3	3.1
Lime yogurt	150g	140	11	1
Granola, homemade (rice Krispies cereal, maple syrup, almonds, canola oil, coconut, vanilla, cinnamon)	1/4 cup	135	1.6	1.3
Eggs	2 Eggs	140	18.4	0
Cheddar Cheese	1 tbsp	20	0.6	0
Bacon	3 slices	120	7.5	0
OJ	3 oz	41	0.8	0
Lunch 11:00 AM
Chicken breast	1/2 breast	107	12.5	0
Baked potato	1/2 medium	61	2.5	0.9
Carrots	2 large	82	1.8	0.55
Broccoli and caulflower salad w/bacon bits	1 cup	200	1.5	2.4
Dressing - Plain ACV, Mayo	1 tbsp	100	0	0
Orange	1 medium	45	0	2.3
Dark chocolate bar	1/3 serving	63	0.8	1
Dinner 6:00 PM
Vegetable Beef Stew, homemade (onion, carrot, potato, lamb)	1 1/2 cup	344	24	5
Total		1997.8	93.9	21.55
Food Name	Portion Size	Calorie (kcal)	Protein (g)	Fiber (g)
Breakfast: Home, Table
Real Ketones Clinically Proven Keto	1 stick	70	0	0
Lunch: Home, table
Healthy Life Keto Bread	2 slices	60	10	6
Land O'Frost Smoked Ham	4 slices	60	8.4	0
Great Value Pepper Jack Cheese	1 slice	70	4	0
Chobani Flip Key Lime	1 container	170	12	1.5
Dinner: Home, table
Idahoan Mashed Potatoes, Roasted Garlic	1/4 cup	55	0.6	1.2
Seasoned greenbeans	1 cup	303	0	6
Banquet Salisbury Steak and Brown Gravy	1 Tray	170	8	1
Healthy Life Keto Bread	2 slices	60	10	6
Total		1018	53	21.7
Food Name	Portion Size	Calorie (kcal)	Protein (g)	Fiber (g)
Breakfast 8:30 AM, Kitchen
Protein Shake (LeVel-Thrive)	1 shake	116	15	8
2% Milk	12 oz	183	12	0
Lunch 12:00 PM, Kitchen
Progresso Chicken and Wild Rice Soup	19 oz	160	10	2
Saltine Crackers	5 crackers	209	4.7	1.4
Snack 3:30 PM, Car
Docibano wafers	12 cookies	260	2	0
Dinner 6:00 PM, Kitchen
KFC Chicken - no skin eaten	1 piece white meat	530	35	0
KFC mashed potatoes w/gravy	1/2 cup	130	3	1
KFC cole slaw	1/4 cup	170	1	4
KFC Biscuit w/jelly	1 biscuit	180	4	1
Snack 8:30, Living room TV
Fig bars	2 bars	200	2	2
Hot tea, decaffeinated	12 oz	3.6	0	0
Total		2141.6	88.7	19.4
Food Name	Portion Size	Calorie (kcal)	Protein (g)	Fiber (g)
Breakfast 6:30 AM, Home at a table
Egg, whole, fried without fat	2	125.58	11.0526	0
Sugar, brown	3	52.44	0.01656	0
Oatmeal, regular or quick, made with water, NS as to fat added in cooking	0.5	91.2	2.616	2.04
Lunch 12:00 PM, unknown
Pasta, cooked	1	219.8	8.064	2.52
Ranch dip, regular	2	129.9	0.672	0.09
Spaghetti sauce with meat	0.5	115.7	7.696	1.95
Cheese, Colby Jack	0.4	173.568	10.9022	0
Lettuce iceberg (includes crisphead types) raw	1	10.1	0.648	0.864
Cookie, brownie, without icing	1	202.5	2.4	1.05
Dinner 6:00 PM, Home at a table
Macaroni or noodles with cheese, made from packaged mix	1	407.1	10.649	2.3
Chicken wing, grilled with sauce	1	137.5	10.4665	0.11
Total		1665.39	65.1829	10.924
Food Name	Portion Size	Calorie (kcal)	Protein (g)	Fiber (g)
Breakfast
Hard boiled eggs	2	125.8	11.1	0
Low fat cottage cheese	1 cup	183.1	23.6	0
Breakfast sausage link	1 link	65	3.7	0
Lunch
Mixed greens	1 cup	6.7	0.5	1.1
Ranch dressing, light	2 tbsp	60	0.7	0.1
Grilled cheese, white bread, buttered	1 sandwich	378.2	12.1	1.6
Snack
Carrots, raw	8 baby size	32.8	0.7	2.2
Hummus, plain	1/2 cup	312	9.8	7.1
Dinner
Chop steak	1 palm sized	325	31.9	0
Onion gravy	2 Tbsp	29.5	0.8	0
Mashed potatoes	1/2 cup	138.8	2.7	1.5
Green beans	1/2 cup	15.5	0.9	1.4
Total		1672.4	98.5	15
Food Name	Portion Size	Calorie (kcal)	Protein (g)	Fiber (g)
Breakfast
Frosted shredded wheat	120 g	420	10	12
Almond milk	70g	11	0.4	0
Coffee	1 cup	2.4	0.3	0
Lunch
Iceberg lettuce	1/2 cup	2.5	0.2	0.2
90% ground beeg	90g	158.4	18	0
Sour cream	25g	54.6	0.7	0
Shredded colby cheese	30g	52.1	3.3	0
New York Bakery Chipotle Cheddar Texas Toast Strips	30g	145.3	2.1	1.4
1 clear america	1 can	0	0	0
Dinner
Iceberg lettuce	1/2 cup	2.5	0.2	0.2
90% ground beeg	90g	158.4	18	0
Sour cream	25g	54.6	0.7	0
Shredded colby cheese	30g	52.1	3.3	0
New York Bakery Chipotle Cheddar Texas Toast Strips	30g	145.3	2.1	1.4
1 clear america	1 can	0	0	0
Coffee	1	2.4	0.3	0
Snack
Bakery fresh goodness banana nut muffin Kroger	1/2 muffin	235	3.1	0.8
Tootsie pops	2	145	0	0
1 clear america	1 can	0	0	0
Total		1208.2	52	4
Food Name	Portion Size	Calorie (kcal)	Protein (g)	Fiber (g)
Breakfast
Peanut Butter Bar	1 bar	190	19	6
Peppermint Patty	3	420	3	3
Coffee	1 cup	2.4	0.3	0
Lunch
Homemade noodle soup	1 cup	173.5	8.7	3.6
Dinner
Sour cream	1 Tbsp	45.5	0.6	0
Potato chips	3 cups	399	4.8	2.3
Chicken thigh, fried, skin removed	2 medium	528	46	0.4
Corn	1/2 cup	92.3	3.3	2.6
Baked potato	1 medium	213.9	4.5	3.5
Total		2064.6	90.2	21.4

## Sheet: Full 12 Month Records
Food Name	Portion Size	Calorie (kcal)	Protein (g)	Fiber (g)
Breakfast Time and Place:
Canyon Gluten Free Bagel	1 bagel	260	4	2
Strawberry Cream Cheese	3 tbsp.	105	3	0
Lunch Time and Place:
Turkey lunchmeat	4 slices	120	12	0
Cheddar cheese	1 slice	80	5	0
Dinner Time and Place:
Mashed potatoes	1 1/2 cups	450	12	8
Chicken	1/2 cup	74	7	0
Beef	1/4 cup	97	9	0
Green and red peppers	1/2 cup	14	0.75	2
Zucchini	1/2 cup	10	0.5	1
Snack: Time and Place:
Iced, mocha, low fat milk	1 medium	230	9	0
Total		1440	62.25	13
Food Name	Portion Size	Calorie (kcal)	Protein (g)	Fiber (g)
Breakfast Time and Place:
Lenders blueberry bagel	1 bagel	230	8	2
Plain cream cheese	1 tbsp.	40	1	0
Coffee creamer	1 tbsp.	30	0	0
Coffee, black	1 cup	1.5	0.3	0
Lunch Time and Place:
Spaghetti with meat sauce	1 1/2 cups	375	13.5	3
Dinner Time and Place:
Grilled chicken leg	1 leg	174	24.2	0
Salad greens	1 cup	22.3	1.1	2.2
Ranch dressing	2 tbsp.	129	0.4	0
Grilled zucchini	1/2 cup	18.5	2.4	1
Baby potatoes	2 potatoes	150	2.2	1.7
Snack: Time and Place:
Baby carrots	10	41	0.9	2.8
Plain hummus	1/2 cup	312	9.8	7.1
Total		1523.3	63.8	19.8
Food Name	Portion Size	Calorie (kcal)	Protein (g)	Fiber (g)
Breakfast Time and Place:
Real ketones packet	1 packet	70	6	3
Bacon Muffin	1 muffin	97	8	0.2
Lunch Time and Place:
Small curd cottage cheese	1/2 cup	85.1	11	0
Oscar mayer smokies	2	150	7	0
Dinner Time and Place:
Ball game dill pickle	1 extra large	16	0	0
Snack: Time and Place:
Chobani Flip Key Lime	2 container	340	24	3
Flat iron steak	6 oz	206.6	36.5	0
Butter	1 tsp.	33	0	0
Sauteed mushrooms	1/2 cup	14	1.9	1
Total		1011.7	94.4	7.2
Food Name	Portion Size	Calorie (kcal)	Protein (g)	Fiber (g)
Breakfast Time and Place:
McDonalds Oatmeal	1 container	290	5	2
Lunch Time and Place:
Turkey meat loaf, homemade	2 thin slices	180	16	1.5
Dinner Time and Place:
Spaghetti with meat sauce	1 cup	329	20.2	0
Bread stick	1 stick	143	6.5	0.9
Snack: Time and Place:
Apple	1 medium	94.6	0.5	4.4
Mango	1 small	124.2	1.7	3.3
Total		1160.8	49.9	12.1
Food Name	Portion Size	Calorie (kcal)	Protein (g)	Fiber (g)
Breakfast Time and Place:
Coffee	10 oz	1.5	0.3	0
Half and Half	2 tbsp.	40	1	0
Quaker oats	1/3 cup dry	100	3.3	2.7
Almond milk, unsweetened	2/3 cup	20	0.66	0
Apple	1 medium	61	0.35	1.7
Greek yogurt, Chobani, vanilla, fat free	3/4 cup	130	14	0
Strawberries	3	34	0.75	3
Omelet, homemade	3 egg	516	34	0.1
Bacon	1 slice	45	4	0
Orange juice	4 oz	55	1	0
Coffee	10 oz	1.5	0.3	2
Half and Half	2 tbsp.	40	1	0
Lunch Time and Place:
Beef, vegetable soup, homemade	2 cups	159	5.8	3.4
Parmesan, shredded cheese	1/4 cup	110	9	1
Almond crackers by Blue Diamond	8 crackers	65	1.5	0.5
Orange	1 small	60	1	3
Z Bar, chocolate chip	1 bar	140	2	2
Dinner Time and Place:
Rudi's homestyle multigrain gluten free bread	2 slices	180	2	4
Cheddar cheese	4 slices	147	10.6	0
Pickles	3 chips	10	0	0
Frozen peas	1 cup	70	5	4
Total		1985	97.56	27.4
	Portion Size	Calorie (kcal)	Protein (g)	Fiber (g)
Breakfast Time and Place:
Egg, whole, fried with cooking spray	2	132.8	11.264	0
Cereal, fruit rings	1	127.5	1.802	3.1
Milk, fat free (skim)	0.75	62.22	6.1671	0
Lunch Time and Place:
Taco or tostada salad with meat and sour cream	1	804.6	30.6642	11.622
Dinner Time and Place:
Cookie, chocolate chip	3	295.2	3.06	1.2
Lasagna with meat	1	286.34	15.347	3.296
Garlic bread, from frozen	0.5	64.75	1.5466	0.4625
Beans, snap, green, canned, drained solids	0.5	14.2	0.71	1.28
Banana	1	105	1.2862	3.068
Total		1892.61	71.8471	24.0285
Food Name	Portion Size	Calorie (kcal)	Protein (g)	Fiber (g)
Breakfast Time and Place:
Eggs	2 medium	125.8	11	0
Strawberries	1/2 cup	23	0.5	1.4
Blueberries	1/2 cup	42.2	0.5	1.8
Walnuts, chopped	1 Tbsp.	68	1.6	0.7
Oikos Zero Vanilla yogurt	3/4 cup	108	18.7	0
Coffee	10 oz	1.5	0.3	2
Lunch Time and Place:
Spinach	1 cup	5.8	0.7	0.6
Strawberries	1/4 cup	12.5	0.5	0.7
Blueberries	1/4 cup	21.1	0.3	0.9
Walnuts, chopped	1 Tbsp.	68	1.6	0.7
Lite Raspberry Vinagrette	1 Tbsp.	30.3	0.2	0.2
Cottage cheese	1 cup	170	21.9	0
Packaged tuna	1 pack	143	32	0
Mayonnaise	1 tsp	32	0	0
Rice krispie treat	1 snack size	90	0	0
Coffee	10 oz	1.5	0.3	2
Dinner Time and Place:
Shredded chicken	1 cup	275.6	31.4	0.5
Mixed vegetables	1 cup	118	5.2	8
Popcorn, plain	1/2 cup	29.6	0.5	0.6
Kit kat	1 snack size	77.7	1	0.1
Werther's caramel	1 caramel	22	0	0
Coffee	10 oz	1.5	0.3	2
Total		1467.1	128.5	22.2
Food Name	Portion Size	Calorie (kcal)	Protein (g)	Fiber (g)
Breakfast Time and Place:
Hyvee brand protein bar	1	180	10	2
Mission carb balance tortilla	1	70	5	15
hard boiled egg	1	70	6	0
cheddar cheese	1	80	5	0
turkey sandwich meat	0.5	100	18	0
Lunch Time and Place:
V8 Energy juice	1	50	0	0
Hyvee greek yogurt	1	80	13	0
Chicken breast, NS as to cooking method, skin not eaten	1	172.8	33.648	0
Dinner Time and Place:
Green beans, canned	3	30	1.5	3
Betty Crocker julienne boxed potatoes	2	300	2	4
Tillamook Zero Sugar beef jerky	1	70	14	0
Total		1202.8	108.148	24
Food Name	Portion Size	Calorie (kcal)	Protein (g)	Fiber (g)
Breakfast Time and Place:
Thrive, vanilla lifestyle mix	1 packet	120	18	0
Low fat milk	1 cup	105	8	0
Strawberries	1 cup, whole	50	1	3
Lunch Time and Place:
Butter lettuce	2 cups	14	1	1
Shredded cheddar cheese	14g	55	4	0
Ranch dressing	2 Tbsp	97	0	0
Croutons	1 Tbsp.	18	1	0
85% hamburger	4 oz cooked	200	21	0
Carrots	1 medium	25	1	2
Dinner Time and Place:
Chili, homemade with 85% lean meat and pinto beans	2 cups	318	45	14
Nabisco saltines	10 crackers	140	2	0
Shredded cheddar cheese	28g	110	7	0
Total		1252	109	20
	Portion Size	Calorie (kcal)	Protein (g)	Fiber (g)
Breakfast Time and Place:
activia probiotic yogurt drink	1	70	3	1
Coffee, brewed	1	4.8	0.576	0
Coffee creamer,powder, sugar free, flavored	5	79.35	0.372	0
egg	3	70	6	0
Bacon or side pork, fresh, cooked	1	37.44	2.7136	0
american cheese	1	60	3	0
Lunch Time and Place:
subway chicken bacon ranch	1	610	34	3
Dinner Time and Place:
clear america can	1	0	0	0
Bacon or side pork, fresh, cooked	2.5	93.6	6.784	0
tortilla strips for salad	3	105	3	0
Total		808.6	43.784	3
