# Supplementary material for: Feasibility and acceptability pilot study of an online weight loss program in rural, underserved communities
Source: PeerJ. 2024 Oct 3;12:e18268. doi: 10.7717/peerj.18268 (PMC11456290; doi:10.7717/peerj.18268)
Supplement: Supplemental Information 12 — Food Frequency Questionnaire raw data for the participants that remained the duration of the 1 year trial. Baseline and 1-year data is provided. [file peerj-12-18268-s012.xlsx]

## Sheet: FFQ 12 Months Analysis
Baseline FFQ	Calories	Protein	Fiber		Protein Density	Fiber Density	12-Month FFQ	Calories per day (baseline)	Calories per day (12 Months)	Grams of Protein per day (Baseline)	Grams of Protein per day (12 Months)	Change in protein grams	Grams of Fiber per day (Baseline)	Grams of Fiber per day (12 Months)	change in fiber grams	Protein Density (Baseline)	Protein Density (12 Months)	Change in protein density	Fiber Density (Baseline)	Fiber Density (12 Months)	Change in Fiber Density
Ashley	1826.87	97.3982	17.4865		5.33142	0.957183	a	1621.31	1116.79	73.3541	63.9847	-9.3694	14.6705	13.5835	-1.087	4.52438	5.72935	1.20497	0.904855	1.2163	0.311444
Jennifer	2861.61	129.978	19.0905		4.54215	0.667125	b	2284.13	2598.55	118.709	141.808	23.0991	24.9555	28.2025	3.247	5.19711	5.45719	0.260077	1.09256	1.08532	-0.00724449
John	2202.84	103.718	32.6165		4.70839	1.48066	c	1473.64	1425.39	90.0431	102.472	12.4288	12.5239	9.3254	-3.1985	6.11025	7.18904	1.07879	0.849862	0.654235	-0.195627
Jonna	2327.55	88.3272	24.6975		3.79486	1.06109	d	2327.55	1718.67	88.3272	110.388	22.0611	24.6975	25.5205	0.823	3.79486	6.42289	2.62804	1.06109	1.4849	0.423805
Julie N	1473.64	90.0431	12.5239		6.11025	0.849862	e	2022.76	2297.66	111.457	122.141	10.6838	10.972	14.1916	3.2196	5.51016	5.31589	-0.194268	0.542428	0.617656	0.0752273
Julie S	2284.13	118.709	24.9555		5.19711	1.09256	f	1692.4	1160.79	78.3934	44.0163	-34.3771	18.151	15.418	-2.733	4.6321	3.79194	-0.840156	1.0725	1.32824	0.255735
Karen	1621.31	73.3541	14.6705		4.52438	0.904855	g	1826.87	1275.87	97.3982	87.0783	-10.3199	17.4865	11.238	-6.2485	5.33142	6.82501	1.49359	0.957183	0.88081	-0.076373
Kathy	2022.76	111.457	10.972		5.51016	0.542428	h	2202.84	3188.39	103.718	269.793	166.074	32.6165	23.518	-9.0985	4.70839	8.46173	3.75333	1.48066	0.737614	-0.743043
Sarah	1692.4	78.3934	18.151		4.6321	1.0725	i	2020.88	1960.77	121.623	109.649	-11.9742	19.1412	21.3281	2.1869	6.01833	5.59215	-0.42618	0.947172	1.08774	0.140571
Tresa	2020.88	121.623	19.1412		6.01833	0.947172	j	2861.61	1852.33	129.978	92.6966	-37.2817	19.0905	18.3055	-0.785	4.54215	5.00432	0.462176	0.667125	0.988241	0.321116
	2033.4	101.3	19.4305		5.03691	0.957544	k	2033.4	1859.52	101.3	114.403	13.1025	19.4305	18.0631	-1.3674	5.03691	5.97895	0.942037	0.957544	1.00811	0.0505612
							l	409.116	675.209	19.0423	61.3298	57.7949	6.49494	6.35852	4.06878	0.728285	1.29949	1.42099	0.255377	0.289234	0.340138
