# Supplementary material for: Feasibility and acceptability pilot study of an online weight loss program in rural, underserved communities
Source: PeerJ. 2024 Oct 3;12:e18268. doi: 10.7717/peerj.18268 (PMC11456290; doi:10.7717/peerj.18268)
Supplement: Supplemental Information 13 — Body composition, weight, waist and hip circumference, measurements of participants at baseline, 6 months, and 1 year. [file peerj-12-18268-s013.xlsx]

## Sheet: a
Basic Information	Name	Gender	Height		Is participant Asian? (to determine standard BMI)	Measurement	Body Composition Parameter	Baseline	3-month	6-month	9-month	12-month	15-month	18-month	21-month	24-month
		Female	156	cm	No		Weight (from scale in lb)	209.88		195.3		201.3
			1.56	m	Standard Healthy BMI		Weight (kg)	95.2		88.5714	0	91.2925	0	0	0	0
			5	ft	25		BMI (kg/m2)	39.119		36.3952	0	37.5134	0	0	0	0
			1	in	Weight at BMI=25 or 23 (kg)		Waist Circumference (cm)	114		109		110
					60.84		Hip Circumference (cm)	117		117		120
	Find the data from Inbody report				Weight at BMI=25 or 23 (lb)		Waist Circumference (in)	44.8819		42.9134	0	43.3071	0	0	0	0
	AutoFill, don't change the formula				134.152		Hip Circumference (in)	46.063		46.063	0	47.2441	0	0	0	0
	Report in progress sheet						WHR (WC/HC)	0.974359		0.931624	#DIV/0!	0.916667	#DIV/0!	#DIV/0!	#DIV/0!	#DIV/0!
For baseline weight, we use weight from Inbody measurement							Total Body water (L)	35.2		35.7		34.9
For following weight, we use weight from the scale							Dry Lean Mass (kg)	12.8		13.1		12.7
							Lean Body Mass (kg)	48		48.8	0	47.6	0	0	0	0
							Body Fat Mass (kg)	47.2		39.8		43.7
							Body Fat Mass (lb)	104.076		87.759	0	96.3585	0	0	0	0
							Percent fat mass (%)	49.6		45		47.8
							SMM (kg)	26.5		27		26.3
							SMM (lb)	58.4325		59.535	0	57.9915	0	0	0	0
						Calculation	Fat Mass to Lose (kg)	34.676		26.626	0	31.1119	0	0	0	0
							Fat Mass to Lose (lb)	76.4606		58.7103	0	68.6016	0	0	0	0
							Healthy Body Weight at 23% (female), 15% (male) PBF (kg)	54.432		57.2649	0	54.7137	0	0	0	0
							Healthy Body Weight at 23% (female), 15% (male) PBF (lb)	120.023		126.269	0	120.644	0	0	0	0
							Is H20>F6?	No		No	No	No	No	No	No	No
							Muscular level	Average		Average	Average	Average	Average	Average	Average	Average
							Healthy BMI	25		25	25	25	25	25	25	25
							Target Weight (kg)	60.84		60.84	60.84	60.84	60.84	60.84	60.84	60.84
							Target Weight (lb)	134.152		134.152	134.152	134.152	134.152	134.152	134.152	134.152
							Weight to Lose (kg)	34.36		27.7314	-60.84	30.4525	-60.84	-60.84	-60.84	-60.84
							Weight to Lose (lb)	75.7279		61.1478	-134.152	67.1478	-134.152	-134.152	-134.152	-134.152
							Timeline for 1 lb/week (week)	75.7279		61.1478	-134.152	67.1478	-134.152	-134.152	-134.152	-134.152
							Timeline for 1 lb/week (month)	17.4287		14.0731	-30.8751	15.454	-30.8751	-30.8751	-30.8751	-30.8751
							Timeline for 2 lb/week (week)	37.8639		30.5739	-67.0761	33.5739	-67.0761	-67.0761	-67.0761	-67.0761
							Timeline for 2 lb/week (month)	8.71437		7.03657	-15.4375	7.72702	-15.4375	-15.4375	-15.4375	-15.4375
							Target weight at next 3 month (lb)	196.88		182.3	-13	188.3	-13	-13	-13	-13

## Sheet: b
Basic Information	Name	Gender	Height		Is participant Asian? (to determine standard BMI)	Measurement	Body Composition Parameter	Baseline	3-month	6-month	9-month	12-month	15-month	18-month	21-month	24-month
		Female	157.5	cm	No		Weight (from scale in lb)	192.24		155.9		166.2
			1.575	m	Standard Healthy BMI		Weight (kg)	87.2		70.7	0	75.4	0	0	0	0
			5	ft	25		BMI (kg/m2)	35.1524		28.5009	0	30.3956	0	0	0	0
			2	in	Weight at BMI=25 or 23 (kg)		Waist Circumference (cm)	108		98		98
					62.0156		Hip Circumference (cm)	125		110		111
	Find the data from Inbody report				Weight at BMI=25 or 23 (lb)		Waist Circumference (in)	42.5197		38.5827	0	38.5827	0	0	0	0
	AutoFill, don't change the formula				136.744		Hip Circumference (in)	49.2126		43.3071	0	43.7008	0	0	0	0
	Report in progress sheet						WHR (WC/HC)	0.864		0.890909	#DIV/0!	0.882883	#DIV/0!	#DIV/0!	#DIV/0!	#DIV/0!
For baseline weight, we use weight from Inbody measurement							Total Body water (L)	34.2		32.2		33.8
For following weight, we use weight from the scale							Dry Lean Mass (kg)	12.5		11.8		12.3
							Lean Body Mass (kg)	46.7		44	0	46.1	0	0	0	0
							Body Fat Mass (kg)	40.5		26.7		29.3
							Body Fat Mass (lb)	89.3025		58.8735	0	64.6065	0	0	0	0
							Percent fat mass (%)	46.5		37.7		38.8
							SMM (kg)	25.7		24.1		25.1
							SMM (lb)	56.6685		53.1405	0	55.3455	0	0	0	0
						Calculation	Fat Mass to Lose (kg)	28.017		14.3085	0	16.39	0	0	0	0
							Fat Mass to Lose (lb)	61.7775		31.5502	0	36.14	0	0	0	0
							Healthy Body Weight at 23% (female), 15% (male) PBF (kg)	54.259		53.872	0	56.125	0	0	0	0
							Healthy Body Weight at 23% (female), 15% (male) PBF (lb)	119.641		118.788	0	123.756	0	0	0	0
							Is H20>F6?	No		No	No	No	No	No	No	No
							Muscular level	Average		Average	Average	Average	Average	Average	Average	Average
							Healthy BMI	25		25	25	25	25	25	25	25
							Target Weight (kg)	62.0156		62.0156	62.0156	62.0156	62.0156	62.0156	62.0156	62.0156
							Target Weight (lb)	136.744		136.744	136.744	136.744	136.744	136.744	136.744	136.744
							Weight to Lose (kg)	25.1844		8.68438	-62.0156	13.3844	-62.0156	-62.0156	-62.0156	-62.0156
							Weight to Lose (lb)	55.4955		19.1555	-136.744	29.4555	-136.744	-136.744	-136.744	-136.744
							Timeline for 1 lb/week (week)	55.4955		19.1555	-136.744	29.4555	-136.744	-136.744	-136.744	-136.744
							Timeline for 1 lb/week (month)	12.7723		4.40864	-31.4717	6.77918	-31.4717	-31.4717	-31.4717	-31.4717
							Timeline for 2 lb/week (week)	27.7478		9.57777	-68.3722	14.7278	-68.3722	-68.3722	-68.3722	-68.3722
							Timeline for 2 lb/week (month)	6.38614		2.20432	-15.7358	3.38959	-15.7358	-15.7358	-15.7358	-15.7358
							Target weight at next 3 month (lb)	179.24		142.9	-13	153.2	-13	-13	-13	-13

## Sheet: c
Basic Information	Name	Gender	Height		Is participant Asian? (to determine standard BMI)	Measurement	Body Composition Parameter	Baseline	3-month	6-month	9-month	12-month	15-month	18-month	21-month	24-month
		Female	155	cm	No		Weight (from scale in lb)	168.2		138.2		141.9
			1.55	m	Standard Healthy BMI		Weight (kg)	76.3		62.6757	0	64.4	0	0	0	0
			5	ft	25		BMI (kg/m2)	31.7586		26.0877	0	26.8054	0	0	0	0
			1	in	Weight at BMI=25 or 23 (kg)		Waist Circumference (cm)	101		85		87
					60.0625		Hip Circumference (cm)	104		95		98
	Find the data from Inbody report				Weight at BMI=25 or 23 (lb)		Waist Circumference (in)	39.7638		33.4646	0	34.252	0	0	0	0
	AutoFill, don't change the formula				132.438		Hip Circumference (in)	40.9449		37.4016	0	38.5827	0	0	0	0
	Report in progress sheet						WHR (WC/HC)	0.971154		0.894737	#DIV/0!	0.887755	#DIV/0!	#DIV/0!	#DIV/0!	#DIV/0!
For baseline weight, we use weight from Inbody measurement							Total Body water (L)	31.7		32.3		32.1
For following weight, we use weight from the scale							Dry Lean Mass (kg)	11.5		11.7		11.7
							Lean Body Mass (kg)	43.2		44	0	43.8	0	0	0	0
							Body Fat Mass (kg)	33.1		18.7		20.6
							Body Fat Mass (lb)	72.9855		41.2335	0	45.423	0	0	0	0
							Percent fat mass (%)	43.4		29.9		32
							SMM (kg)	24.1		24.4		24.3
							SMM (lb)	53.1405		53.802	0	53.5815	0	0	0	0
						Calculation	Fat Mass to Lose (kg)	21.3125		5.87614	0	7.936	0	0	0	0
							Fat Mass to Lose (lb)	46.9941		12.9569	0	17.4989	0	0	0	0
							Healthy Body Weight at 23% (female), 15% (male) PBF (kg)	51.24		55.7588	0	55.062	0	0	0	0
							Healthy Body Weight at 23% (female), 15% (male) PBF (lb)	112.984		122.948	0	121.412	0	0	0	0
							Is H20>F6?	No		No	No	No	No	No	No	No
							Muscular level	Average		Average	Average	Average	Average	Average	Average	Average
							Healthy BMI	25		25	25	25	25	25	25	25
							Target Weight (kg)	60.0625		60.0625	60.0625	60.0625	60.0625	60.0625	60.0625	60.0625
							Target Weight (lb)	132.438		132.438	132.438	132.438	132.438	132.438	132.438	132.438
							Weight to Lose (kg)	16.2375		2.61324	-60.0625	4.3375	-60.0625	-60.0625	-60.0625	-60.0625
							Weight to Lose (lb)	35.7622		5.76219	-132.438	9.46219	-132.438	-132.438	-132.438	-132.438
							Timeline for 1 lb/week (week)	35.7622		5.76219	-132.438	9.46219	-132.438	-132.438	-132.438	-132.438
							Timeline for 1 lb/week (month)	8.23065		1.32617	-30.4805	2.17772	-30.4805	-30.4805	-30.4805	-30.4805
							Timeline for 2 lb/week (week)	17.8811		2.88109	-66.2189	4.73109	-66.2189	-66.2189	-66.2189	-66.2189
							Timeline for 2 lb/week (month)	4.11533		0.663083	-15.2403	1.08886	-15.2403	-15.2403	-15.2403	-15.2403
							Target weight at next 3 month (lb)	155.2		125.2	-13	128.9	-13	-13	-13	-13

## Sheet: d
Basic Information	Name	Gender	Height		Is participant Asian? (to determine standard BMI)	Measurement	Body Composition Parameter	Baseline	3-month	6-month	9-month	12-month	15-month	18-month	21-month	24-month
		Female	166	cm	No		Weight (from scale in lb)	204.589		192.9		182.4
			1.66	m	Standard Healthy BMI		Weight (kg)	92.8		87.5	0	82.8	0	0	0	0
			5	ft	25		BMI (kg/m2)	33.6769		31.7535	0	30.0479	0	0	0	0
			5	in	Weight at BMI=25 or 23 (kg)		Waist Circumference (cm)	115		110		95
					68.89		Hip Circumference (cm)	121		112		103
	Find the data from Inbody report				Weight at BMI=25 or 23 (lb)		Waist Circumference (in)	45.2756		43.3071	0	37.4016	0	0	0	0
	AutoFill, don't change the formula				151.902		Hip Circumference (in)	47.6378		44.0945	0	40.5512	0	0	0	0
	Report in progress sheet						WHR (WC/HC)	0.950413		0.982143	#DIV/0!	0.92233	#DIV/0!	#DIV/0!	#DIV/0!	#DIV/0!
For baseline weight, we use weight from Inbody measurement							Total Body water (L)	39.6		37.9		37.7
For following weight, we use weight from the scale							Dry Lean Mass (kg)	14.5		13.9		13.7
							Lean Body Mass (kg)	54.1		51.8	0	51.4	0	0	0	0
							Body Fat Mass (kg)	38.7		35.7		31.4
							Body Fat Mass (lb)	85.3335		78.7185	0	69.237	0	0	0	0
							Percent fat mass (%)	41.7		40.8		37.9
							SMM (kg)	30.3		28.8		28.7
							SMM (lb)	66.8115		63.5	0	63.2835	0	0	0	0
						Calculation	Fat Mass to Lose (kg)	23.787		21.3465	0	16.936	0	0	0	0
							Fat Mass to Lose (lb)	52.4503		47.069	0	37.3439	0	0	0	0
							Healthy Body Weight at 23% (female), 15% (male) PBF (kg)	64.829		62.398	0	62.882	0	0	0	0
							Healthy Body Weight at 23% (female), 15% (male) PBF (lb)	142.948		137.588	0	138.655	0	0	0	0
							Is H20>F6?	No		No	No	No	No	No	No	No
							Muscular level	Average		Average	Average	Average	Average	Average	Average	Average
							Healthy BMI	25		25	25	25	25	25	25	25
							Target Weight (kg)	68.89		68.89	68.89	68.89	68.89	68.89	68.89	68.89
							Target Weight (lb)	151.902		151.902	151.902	151.902	151.902	151.902	151.902	151.902
							Weight to Lose (kg)	23.91		18.61	-68.89	13.91	-68.89	-68.89	-68.89	-68.89
							Weight to Lose (lb)	52.6865		40.9975	-151.902	30.4975	-151.902	-151.902	-151.902	-151.902
							Timeline for 1 lb/week (week)	52.6865		40.9975	-151.902	30.4975	-151.902	-151.902	-151.902	-151.902
							Timeline for 1 lb/week (month)	12.1258		9.43557	-34.9603	7.019	-34.9603	-34.9603	-34.9603	-34.9603
							Timeline for 2 lb/week (week)	26.3433		20.4988	-75.9512	15.2488	-75.9512	-75.9512	-75.9512	-75.9512
							Timeline for 2 lb/week (month)	6.06289		4.71778	-17.4801	3.5095	-17.4801	-17.4801	-17.4801	-17.4801
							Target weight at next 3 month (lb)	191.589		179.9	-13	169.4	-13	-13	-13	-13

## Sheet: e
Basic Information	Name	Gender	Height		Is participant Asian? (to determine standard BMI)	Measurement	Body Composition Parameter	Baseline	3-month	6-month	9-month	12-month	15-month	18-month	21-month	24-month
		Female	161	cm	No		Weight (from scale in lb)	248.68		245.6		246.7
			1.61	m	Standard Healthy BMI		Weight (kg)	112.8		111.383	0	111.9	0	0	0	0
			5	ft	25		BMI (kg/m2)	43.5168		42.9703	0	43.1696	0	0	0	0
			3	in	Weight at BMI=25 or 23 (kg)		Waist Circumference (cm)	120		120		121
					64.8025		Hip Circumference (cm)	129		129		128
	Find the data from Inbody report				Weight at BMI=25 or 23 (lb)		Waist Circumference (in)	47.2441		47.2441	0	47.6378	0	0	0	0
	AutoFill, don't change the formula				142.89		Hip Circumference (in)	50.7874		50.7874	0	50.3937	0	0	0	0
	Report in progress sheet						WHR (WC/HC)	0.930233		0.930233	#DIV/0!	0.945312	#DIV/0!	#DIV/0!	#DIV/0!	#DIV/0!
For baseline weight, we use weight from Inbody measurement							Total Body water (L)	42.8		42.9		42.8
For following weight, we use weight from the scale							Dry Lean Mass (kg)	15.5		15.4		15.4
							Lean Body Mass (kg)	58.3		58.3	0	58.2	0	0	0	0
							Body Fat Mass (kg)	54.5		53.1		53.7
							Body Fat Mass (lb)	120.172		117.086	0	118.409	0	0	0	0
							Percent fat mass (%)	48.3		47.6		48
							SMM (kg)	32.9		32.7		32.9
							SMM (lb)	72.5445		72.1035	0	72.5445	0	0	0	0
						Calculation	Fat Mass to Lose (kg)	39.133		37.6613	0	38.3205	0	0	0	0
							Fat Mass to Lose (lb)	86.2883		83.0431	0	84.4967	0	0	0	0
							Healthy Body Weight at 23% (female), 15% (male) PBF (kg)	66.791		67.104	0	66.846	0	0	0	0
							Healthy Body Weight at 23% (female), 15% (male) PBF (lb)	147.274		147.964	0	147.395	0	0	0	0
							Is H20>F6?	Yes		Yes	No	Yes	No	No	No	No
							Muscular level	High		High	Average	High	Average	Average	Average	Average
							Healthy BMI	25.7671		25.8879	25	25.7884	25	25	25	25
							Target Weight (kg)	66.791		67.104	64.8025	66.846	64.8025	64.8025	64.8025	64.8025
							Target Weight (lb)	147.274		147.964	142.89	147.395	142.89	142.89	142.89	142.89
							Weight to Lose (kg)	46.009		44.2792	-64.8025	45.054	-64.8025	-64.8025	-64.8025	-64.8025
							Weight to Lose (lb)	101.406		97.6357	-142.89	99.3046	-142.89	-142.89	-142.89	-142.89
							Timeline for 1 lb/week (week)	101.406		97.6357	-142.89	99.3046	-142.89	-142.89	-142.89	-142.89
							Timeline for 1 lb/week (month)	23.3385		22.4708	-32.886	22.8549	-32.886	-32.886	-32.886	-32.886
							Timeline for 2 lb/week (week)	50.7029		48.8178	-71.4448	49.6523	-71.4448	-71.4448	-71.4448	-71.4448
							Timeline for 2 lb/week (month)	11.6693		11.2354	-16.443	11.4275	-16.443	-16.443	-16.443	-16.443
							Target weight at next 3 month (lb)	235.68		232.6	-13	233.7	-13	-13	-13	-13

## Sheet: f
Basic Information	Name	Gender	Height		Is participant Asian? (to determine standard BMI)	Measurement	Body Composition Parameter	Baseline	3-month	6-month	9-month	12-month	15-month	18-month	21-month	24-month
			162	cm	No		Weight (from scale in lb)	227		225.7		208.9
			1.62	m	Standard Healthy BMI		Weight (kg)	102.948		102.4	0	94.8	0	0	0	0
			5	ft	25		BMI (kg/m2)	39.2		39.0184	0	36.1225	0	0	0	0
			4	in	Weight at BMI=25 or 23 (kg)		Waist Circumference (cm)	112		109		104
					65.61		Hip Circumference (cm)	125		125		115
	Find the data from Inbody report				Weight at BMI=25 or 23 (lb)		Waist Circumference (in)	44.0945		42.9134	0	40.9449	0	0	0	0
	AutoFill, don't change the formula				144.67		Hip Circumference (in)	49.2126		49.2126	0	45.2756	0	0	0	0
	Report in progress sheet						WHR (WC/HC)	0.896		0.872	#DIV/0!	0.904348	#DIV/0!	#DIV/0!	#DIV/0!	#DIV/0!
For baseline weight, we use weight from Inbody measurement							Total Body water (L)	37.7		38.9		39.6
For following weight, we use weight from the scale							Dry Lean Mass (kg)	13.7		14.2		14.4
							Lean Body Mass (kg)	51.4		53.1	0	54	0	0	0	0
							Body Fat Mass (kg)	51.5		49.3		40.8
							Body Fat Mass (lb)	113.558		108.706	0	89.964	0	0	0	0
							Percent fat mass (%)	50.1		48.1		43
							SMM (kg)	28.6		29.6		30.1
							SMM (lb)	63.063		65.268	0	66.3705	0	0	0	0
						Calculation	Fat Mass to Lose (kg)	43.5785		41.0162	0	32.1144	0	0	0	0
							Fat Mass to Lose (lb)	96.0906		90.4407	0	70.8123	0	0	0	0
							Healthy Body Weight at 23% (female), 15% (male) PBF (kg)	50.9219		53.405	0	56.364	0	0	0	0
							Healthy Body Weight at 23% (female), 15% (male) PBF (lb)	112.283		117.758	0	124.283	0	0	0	0
							Is H20>F6?	No		No	No	No	No	No	No	No
							Muscular level	Average		Average	Average	Average	Average	Average	Average	Average
							Healthy BMI	25		25	25	25	25	25	25	25
							Target Weight (kg)	65.61		65.61	65.61	65.61	65.61	65.61	65.61	65.61
							Target Weight (lb)	144.67		144.67	144.67	144.67	144.67	144.67	144.67	144.67
							Weight to Lose (kg)	37.3378		36.79	-65.61	29.19	-65.61	-65.61	-65.61	-65.61
							Weight to Lose (lb)	82.3299		81.0299	-144.67	64.23	-144.67	-144.67	-144.67	-144.67
							Timeline for 1 lb/week (week)	82.3299		81.0299	-144.67	64.23	-144.67	-144.67	-144.67	-144.67
							Timeline for 1 lb/week (month)	18.9482		18.649	-33.2958	14.7825	-33.2958	-33.2958	-33.2958	-33.2958
							Timeline for 2 lb/week (week)	41.165		40.515	-72.335	32.115	-72.335	-72.335	-72.335	-72.335
							Timeline for 2 lb/week (month)	9.4741		9.32451	-16.6479	7.39125	-16.6479	-16.6479	-16.6479	-16.6479
							Target weight at next 3 month (lb)	214		212.7	-13	195.9	-13	-13	-13	-13

## Sheet: g
Basic Information	Name	Gender	Height		Is participant Asian? (to determine standard BMI)	Measurement	Body Composition Parameter	Baseline	3-month	6-month	9-month	12-month	15-month	18-month	21-month	24-month
		Male	175	cm	No		Weight (from scale in lb)	237.88		222.9		216.9
			1.75	m	Standard Healthy BMI		Weight (kg)	107.882		101.088	0	98.4	0	0	0	0
			5	ft	25		BMI (kg/m2)	35.2268		33.0085	0	32.1306	0	0	0	0
			9	in	Weight at BMI=25 or 23 (kg)		Waist Circumference (cm)	124		120		114
					76.5625		Hip Circumference (cm)	121		117		116
	Find the data from Inbody report				Weight at BMI=25 or 23 (lb)		Waist Circumference (in)	48.8189		47.2441	0	44.8819	0	0	0	0
	AutoFill, don't change the formula				168.82		Hip Circumference (in)	47.6378		46.063	0	45.6693	0	0	0	0
	Report in progress sheet						WHR (WC/HC)	1.02479		1.02564	#DIV/0!	0.982759	#DIV/0!	#DIV/0!	#DIV/0!	#DIV/0!
For baseline weight, we use weight from Inbody measurement							Total Body water (L)	52.8		49.5		49
For following weight, we use weight from the scale							Dry Lean Mass (kg)	19		17.9		17.7
							Lean Body Mass (kg)	71.8		67.4	0	66.7	0	0	0	0
							Body Fat Mass (kg)	36.1		33.9		31.7
							Body Fat Mass (lb)	79.6005		74.7495	0	69.8985	0	0	0	0
							Percent fat mass (%)	33.4		33.4		32.2
							SMM (kg)	40.8		38.1		37.6
							SMM (lb)	89.964		84.0105	0	82.908	0	0	0	0
						Calculation	Fat Mass to Lose (kg)	24.0465		22.6209	0	20.4482	0	0	0	0
							Fat Mass to Lose (lb)	53.0224		49.8791	0	45.0883	0	0	0	0
							Healthy Body Weight at 23% (female), 15% (male) PBF (kg)	78.9143		73.84	0	73.733	0	0	0	0
							Healthy Body Weight at 23% (female), 15% (male) PBF (lb)	174.006		162.817	0	162.581	0	0	0	0
							Is H20>F6?	Yes		No	No	No	No	No	No	No
							Muscular level	High		Average	Average	Average	Average	Average	Average	Average
							Healthy BMI	25.7679		25	25	25	25	25	25	25
							Target Weight (kg)	78.9143		76.5625	76.5625	76.5625	76.5625	76.5625	76.5625	76.5625
							Target Weight (lb)	174.006		168.82	168.82	168.82	168.82	168.82	168.82	168.82
							Weight to Lose (kg)	28.9678		24.5259	-76.5625	21.8375	-76.5625	-76.5625	-76.5625	-76.5625
							Weight to Lose (lb)	63.8739		54.0797	-168.82	48.0797	-168.82	-168.82	-168.82	-168.82
							Timeline for 1 lb/week (week)	63.8739		54.0797	-168.82	48.0797	-168.82	-168.82	-168.82	-168.82
							Timeline for 1 lb/week (month)	14.7006		12.4464	-38.8539	11.0655	-38.8539	-38.8539	-38.8539	-38.8539
							Timeline for 2 lb/week (week)	31.937		27.0398	-84.4102	24.0398	-84.4102	-84.4102	-84.4102	-84.4102
							Timeline for 2 lb/week (month)	7.35028		6.22321	-19.427	5.53276	-19.427	-19.427	-19.427	-19.427
							Target weight at next 3 month (lb)	224.88		209.9	-13	203.9	-13	-13	-13	-13

## Sheet: h
Basic Information	Name	Gender	Height		Is participant Asian? (to determine standard BMI)	Measurement	Body Composition Parameter	Baseline	3-month	6-month	9-month	12-month	15-month	18-month	21-month	24-month
		Female	162	cm	No		Weight (from scale in lb)	197.75		188.9		194.2
			1.62	m	Standard Healthy BMI		Weight (kg)	89.7		85.7	0	88.1	0	0	0	0
			5	ft	25		BMI (kg/m2)	34.1792		32.6551	0	33.5696	0	0	0	0
			4	in	Weight at BMI=25 or 23 (kg)		Waist Circumference (cm)	98		95		98
					65.61		Hip Circumference (cm)	115		114		110
	Find the data from Inbody report				Weight at BMI=25 or 23 (lb)		Waist Circumference (in)	38.5827		37.4016	0	38.5827	0	0	0	0
	AutoFill, don't change the formula				144.67		Hip Circumference (in)	45.2756		44.8819	0	43.3071	0	0	0	0
	Report in progress sheet						WHR (WC/HC)	0.852174		0.833333	#DIV/0!	0.890909	#DIV/0!	#DIV/0!	#DIV/0!	#DIV/0!
For baseline weight, we use weight from Inbody measurement							Total Body water (L)	32.7		32.9		32.4
For following weight, we use weight from the scale							Dry Lean Mass (kg)	11.8		12.1		11.8
							Lean Body Mass (kg)	44.5		45	0	44.2	0	0	0	0
							Body Fat Mass (kg)	45.2		40.7		43.9
							Body Fat Mass (lb)	99.666		89.7435	0	96.7995	0	0	0	0
							Percent fat mass (%)	50.4		47.5		49.9
							SMM (kg)	24.5		24.8		24.4
							SMM (lb)	54.0225		54.684	0	53.802	0	0	0	0
						Calculation	Fat Mass to Lose (kg)	33.6685		28.7635	0	32.3915	0	0	0	0
							Fat Mass to Lose (lb)	74.239		63.4235	0	71.4233	0	0	0	0
							Healthy Body Weight at 23% (female), 15% (male) PBF (kg)	50.117		51.882	0	50.018	0	0	0	0
							Healthy Body Weight at 23% (female), 15% (male) PBF (lb)	110.508		114.4	0	110.29	0	0	0	0
							Is H20>F6?	No		No	No	No	No	No	No	No
							Muscular level	Average		Average	Average	Average	Average	Average	Average	Average
							Healthy BMI	25		25	25	25	25	25	25	25
							Target Weight (kg)	65.61		65.61	65.61	65.61	65.61	65.61	65.61	65.61
							Target Weight (lb)	144.67		144.67	144.67	144.67	144.67	144.67	144.67	144.67
							Weight to Lose (kg)	24.09		20.09	-65.61	22.49	-65.61	-65.61	-65.61	-65.61
							Weight to Lose (lb)	53.0799		44.23	-144.67	49.5299	-144.67	-144.67	-144.67	-144.67
							Timeline for 1 lb/week (week)	53.0799		44.23	-144.67	49.5299	-144.67	-144.67	-144.67	-144.67
							Timeline for 1 lb/week (month)	12.2163		10.1795	-33.2958	11.3993	-33.2958	-33.2958	-33.2958	-33.2958
							Timeline for 2 lb/week (week)	26.54		22.115	-72.335	24.765	-72.335	-72.335	-72.335	-72.335
							Timeline for 2 lb/week (month)	6.10816		5.08975	-16.6479	5.69965	-16.6479	-16.6479	-16.6479	-16.6479
							Target weight at next 3 month (lb)	184.75		175.9	-13	181.2	-13	-13	-13	-13

## Sheet: i
Basic Information	Name	Gender	Height		Is participant Asian? (to determine standard BMI)	Measurement	Body Composition Parameter	Baseline	3-month	6-month	9-month	12-month	15-month	18-month	21-month	24-month
		Female	169	cm	No		Weight (from scale in lb)	236.99		236.7		244.1
			1.69	m	Standard Healthy BMI		Weight (kg)	107.478		107.6	0	110.7	0	0	0	0
			5	ft	25		BMI (kg/m2)	37.6312		37.7	0	38.7591	0	0	0	0
			7	in	Weight at BMI=25 or 23 (kg)		Waist Circumference (cm)	121		126		126
					71.4025		Hip Circumference (cm)	129		132		134
	Find the data from Inbody report				Weight at BMI=25 or 23 (lb)		Waist Circumference (in)	47.6378		49.6063	0	49.6063	0	0	0	0
	AutoFill, don't change the formula				157.443		Hip Circumference (in)	50.7874		51.9685	0	52.7559	0	0	0	0
	Report in progress sheet						WHR (WC/HC)	0.937984		0.954545	#DIV/0!	0.940299	#DIV/0!	#DIV/0!	#DIV/0!	#DIV/0!
For baseline weight, we use weight from Inbody measurement							Total Body water (L)	42		39.8		41.1
For following weight, we use weight from the scale							Dry Lean Mass (kg)	15.3		14.7		15
							Lean Body Mass (kg)	57.3		54.5	0	56.1	0	0	0	0
							Body Fat Mass (kg)	50.2		53.1		54.6
							Body Fat Mass (lb)	110.691		117.086	0	120.393	0	0	0	0
							Percent fat mass (%)	46.7		49.4		49.3
							SMM (kg)	31.6		30.1		31.1
							SMM (lb)	69.678		66.3705	0	68.5755	0	0	0	0
						Calculation	Fat Mass to Lose (kg)	34.9183		38.853	0	39.9315	0	0	0	0
							Fat Mass to Lose (lb)	76.9948		85.6709	0	88.049	0	0	0	0
							Healthy Body Weight at 23% (female), 15% (male) PBF (kg)	66.4235		61.921	0	63.753	0	0	0	0
							Healthy Body Weight at 23% (female), 15% (male) PBF (lb)	146.464		136.536	0	140.575	0	0	0	0
							Is H20>F6?	No		No	No	No	No	No	No	No
							Muscular level	Average		Average	Average	Average	Average	Average	Average	Average
							Healthy BMI	25		25	25	25	25	25	25	25
							Target Weight (kg)	71.4025		71.4025	71.4025	71.4025	71.4025	71.4025	71.4025	71.4025
							Target Weight (lb)	157.443		157.443	157.443	157.443	157.443	157.443	157.443	157.443
							Weight to Lose (kg)	36.076		36.1975	-71.4025	39.2975	-71.4025	-71.4025	-71.4025	-71.4025
							Weight to Lose (lb)	79.5475		79.2575	-157.443	86.6575	-157.443	-157.443	-157.443	-157.443
							Timeline for 1 lb/week (week)	79.5475		79.2575	-157.443	86.6575	-157.443	-157.443	-157.443	-157.443
							Timeline for 1 lb/week (month)	18.3078		18.2411	-36.2353	19.9442	-36.2353	-36.2353	-36.2353	-36.2353
							Timeline for 2 lb/week (week)	39.7737		39.6287	-78.7213	43.3287	-78.7213	-78.7213	-78.7213	-78.7213
							Timeline for 2 lb/week (month)	9.15391		9.12054	-18.1177	9.97209	-18.1177	-18.1177	-18.1177	-18.1177
							Target weight at next 3 month (lb)	223.99		223.7	-13	231.1	-13	-13	-13	-13

## Sheet: j
Basic Information	Name	Gender	Height		Is participant Asian? (to determine standard BMI)	Measurement	Body Composition Parameter	Baseline	3-month	6-month	9-month	12-month	15-month	18-month	21-month	24-month
		Female	166.5	cm	No		Weight (from scale in lb)	279.33		270.7		274.3
			1.665	m	Standard Healthy BMI		Weight (kg)	126.68		122.8	0	124.4	0	0	0	0
			5	ft	25		BMI (kg/m2)	45.6962		37.7	0	44.8737	0	0	0	0
			6	in	Weight at BMI=25 or 23 (kg)		Waist Circumference (cm)	124.5		120		121
					69.3056		Hip Circumference (cm)	132		130		132
	Find the data from Inbody report				Weight at BMI=25 or 23 (lb)		Waist Circumference (in)	49.0157		47.2441	0	47.6378	0	0	0	0
	AutoFill, don't change the formula				152.819		Hip Circumference (in)	51.9685		51.1811	0	51.9685	0	0	0	0
	Report in progress sheet						WHR (WC/HC)	0.943182		0.923077	#DIV/0!	0.916667	#DIV/0!	#DIV/0!	#DIV/0!	#DIV/0!
For baseline weight, we use weight from Inbody measurement							Total Body water (L)	45.2		44.6		44.4
For following weight, we use weight from the scale							Dry Lean Mass (kg)	16.2		16		16
							Lean Body Mass (kg)	61.4		60.6	0	60.4	0	0	0	0
							Body Fat Mass (kg)	65.3		62.2		64
							Body Fat Mass (lb)	143.987		137.151	0	141.12	0	0	0	0
							Percent fat mass (%)	51.6		50.6		51.4
							SMM (kg)	34.6		34.1		34.1
							SMM (lb)	76.293		75.1905	0	75.1905	0	0	0	0
						Calculation	Fat Mass to Lose (kg)	49.5567		46.532	0	48.494	0	0	0	0
							Fat Mass to Lose (lb)	109.273		102.603	0	106.929	0	0	0	0
							Healthy Body Weight at 23% (female), 15% (male) PBF (kg)	68.419		68.094	0	67.388	0	0	0	0
							Healthy Body Weight at 23% (female), 15% (male) PBF (lb)	150.864		150.147	0	148.591	0	0	0	0
							Is H20>F6?	No		No	No	No	No	No	No	No
							Muscular level	Average		Average	Average	Average	Average	Average	Average	Average
							Healthy BMI	25		25	25	25	25	25	25	25
							Target Weight (kg)	69.3056		69.3056	69.3056	69.3056	69.3056	69.3056	69.3056	69.3056
							Target Weight (lb)	152.819		152.819	152.819	152.819	152.819	152.819	152.819	152.819
							Weight to Lose (kg)	57.3746		53.4944	-69.3056	55.0944	-69.3056	-69.3056	-69.3056	-69.3056
							Weight to Lose (lb)	126.511		117.881	-152.819	121.481	-152.819	-152.819	-152.819	-152.819
							Timeline for 1 lb/week (week)	126.511		117.881	-152.819	121.481	-152.819	-152.819	-152.819	-152.819
							Timeline for 1 lb/week (month)	29.1165		27.1303	-35.1712	27.9588	-35.1712	-35.1712	-35.1712	-35.1712
							Timeline for 2 lb/week (week)	63.2555		58.9405	-76.4095	60.7405	-76.4095	-76.4095	-76.4095	-76.4095
							Timeline for 2 lb/week (month)	14.5582		13.5651	-17.5856	13.9794	-17.5856	-17.5856	-17.5856	-17.5856
							Target weight at next 3 month (lb)	266.33		257.7	-13	261.3	-13	-13	-13	-13

[truncated: 6 more sheets: k, l, m, n, o, p]
