# Supplementary material for: Feasibility and acceptability pilot study of an online weight loss program in rural, underserved communities
Source: PeerJ journal article supplement (doi:10.7717/peerj.18268), 2024-10-03
Supplement: Supplemental_Table_S5.pdf [file Supplemental_Table_S5.pdf]

## Information Technology Access and Literacy Survey Results

| Question                                      | Answer             | Completing Participants (N=10) | Dropped participants (N=6) |
|-----------------------------------------------|--------------------|--------------------------------|----------------------------|
| <b><u>Device and Internet Access</u></b>      |                    |                                |                            |
| <b>Home computer</b>                          | Yes                | 10, 100%                       | 6, 100%                    |
| <b>Tablet</b>                                 | Yes                | 6, 60%                         | 2, 33%                     |
|                                               | No                 | 4, 40%                         | 4, 67%                     |
| <b>Smartphone</b>                             | Yes                | 10, 100%                       | 6, 100%                    |
|                                               | No                 | 0, 0%                          | 0, 0%                      |
| <b>Home internet</b>                          | Yes                | 8, 80%                         | 6, 100%                    |
|                                               | No                 | 2, 20%                         | 0, 0%                      |
| <b>Public internet</b>                        | Yes                | 4, 40%                         | 3, 50%                     |
|                                               | No                 | 6, 60%                         | 3, 50%                     |
| <b>Preferred space for using internet</b>     | Home               | 3, 30%                         | 6, 100%                    |
|                                               | Work               | 5, 50%                         | 0, 0%                      |
| <b>Reliability of internet</b>                | Very reliable      | 1, 10%                         | 2, 33%                     |
|                                               | Reliable           | 2, 20%                         | 0, 0%                      |
|                                               | Somewhat reliable  | 1, 10%                         | 1, 17%                     |
|                                               | Very unreliable    | 4, 40%                         | 3, 50%                     |
| <b><u>Information technology literacy</u></b> |                    |                                |                            |
| <b>Comfort using a computer</b>               | Very comfortable   | 7, 70%                         | 6, 100%                    |
|                                               | Comfortable        | 2, 20%                         | 0, 0%                      |
|                                               | Very uncomfortable | 1, 10%                         | 0, 0%                      |
| <b>Comfort using a smartphone</b>             | Very comfortable   | 7, 70%                         | 5, 83%                     |
|                                               | Comfortable        | 2, 20%                         | 1, 17%                     |
|                                               | Very uncomfortable | 1, 10%                         | 0, 0%                      |
| <b>Comfort using the internet</b>             | Very comfortable   | 7, 70%                         | 6, 100%                    |
|                                               | Comfortable        | 2, 20%                         | 0, 0%                      |
|                                               | Very uncomfortable | 1, 10%                         | 0, 0%                      |
| <b>Overall comfort using</b>                  | Very comfortable   | 5, 50%                         | 4, 67%                     |

|                                                                                   |                    |          |         |
|-----------------------------------------------------------------------------------|--------------------|----------|---------|
| <b>information technology</b>                                                     | Comfortable        | 5, 50%   | 2, 33%  |
| <b>Confidence using Zoom</b>                                                      | Very confident     | 6, 60%   | 3, 50%  |
|                                                                                   | Confident          | 3, 30%   | 2, 33%  |
|                                                                                   | Very unconfident   | 1, 10%   | 1, 17%  |
| <b>Confidence smartphone applications</b>                                         | Very confident     | 8, 80%   | 6, 100% |
|                                                                                   | Confident          | 2, 20%   | 0, 0%   |
| <b>Overall confidence using telehealth, websites, and smartphone applications</b> | Very confident     | 6, 60%   | 6, 100% |
|                                                                                   | Confident          | 3, 30%   | 0, 0%   |
|                                                                                   | Somewhat confident | 1, 10%   | 0, 0%   |
| <b>Ability to open and send</b>                                                   | Very well          | 10, 100% | 6, 100% |
| <b>Ability to forward an email</b>                                                | Very well          | 10, 100% | 6, 100% |
| <b>Ability to open an email</b>                                                   | Very well          | 10, 100% | 6, 100% |
| <b>Ability to use a search engine</b>                                             | Very well          | 8, 80%   | 6, 100% |
|                                                                                   | Well               | 2, 20%   | 0, 0%   |
| <b>Ability to bookmark a webpage</b>                                              | Very well          | 8, 80%   | 6, 100% |
|                                                                                   | Well               | 2, 20%   | 0, 0%   |
| <b>Ability to move back and forth between web pages</b>                           | Very well          | 7, 70%   | 4, 67%  |
|                                                                                   | Well               | 2, 20%   | 2, 33%  |
|                                                                                   | Okay               | 1, 10%   | 0, 0%   |
| <b>Ability to save a document</b>                                                 | Very well          | 10, 100% | 6, 100% |
| <b>Overall ability to use information technology</b>                              | Very well          | 8, 80%   | 6, 100% |
|                                                                                   | Well               | 2, 20%   | 0, 0%   |
